# Supplementary material for: Enzymatic synthesis of a DNA-templated alloy nanocluster and its application in a fluorescence immunoassay
Source: Royal Society of Chemistry journal article supplement (doi:10.1039/c5ra07509b), 2015-01-01
Supplement: c5ra07509b1.pdf [file c5ra07509b1.pdf]

## Supporting Information

# Enzymatic Synthesis of DNA-templated Alloy Nanocluster and Its Application in Fluorescence Immunoassay

Tai Ye,<sup>a</sup> Chunying Li,<sup>a</sup> Chen Su,<sup>a</sup> Xinghu Ji,<sup>a</sup> and Zhike He<sup>\*ab</sup>

<sup>a</sup> Key Laboratory of Analytical Chemistry for Biology and Medicine (Ministry of Education), College of Chemistry and Molecular Sciences, Wuhan University, Wuhan 430072, P. R. China.

<sup>b</sup> Suzhou Institute of Wuhan University, Suzhou, 215123, PR China. E-mail: zhkhe@whu.edu.cn; Fax: +86-27-6875-4067; Tel: +86-27-6875-6557

\*Address correspondence to [zhkhe@whu.edu.cn](mailto:zhkhe@whu.edu.cn).

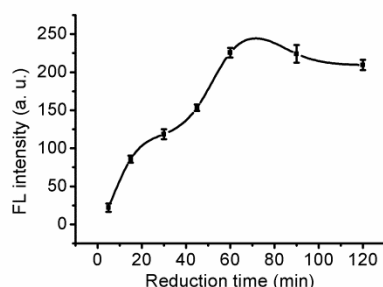

**Figure S1.** The fluorescence of the Cu/Ag NCs with various reduction time.

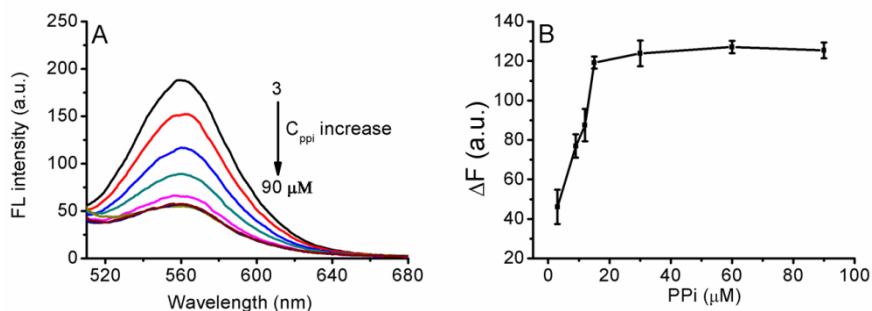

**Figure S2.** (A) Typical fluorescence spectral responses of obtained Cu/Ag NCs under various PPI concentrations at a fixed reduction time of 60 min. (B) Plot of peak intensity of obtained Cu/Ag NCs with respect to PPI concentrations.

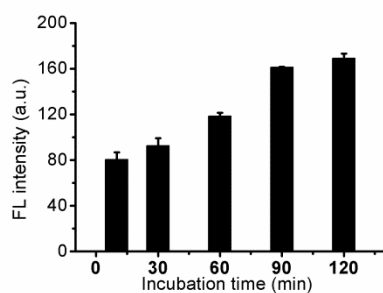

**Figure S3** The effect of incubation time on the assay performance. The concentration of ALP was  $10 \text{ U L}^{-1}$ .

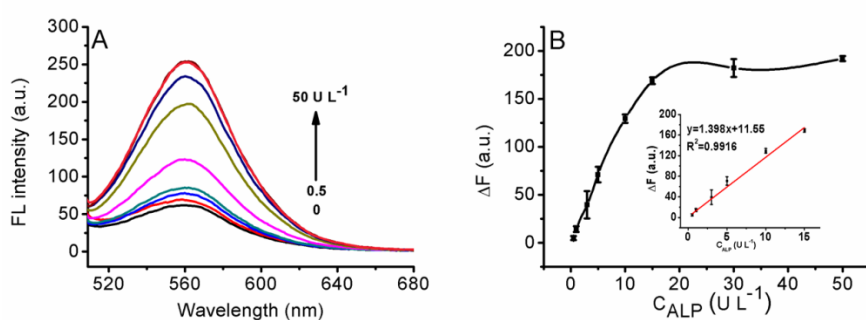

**Figure S4** (A) Fluorescence spectra of obtained Cu/Ag NCs in the presence of ALP with different concentrations. (B) Calibration curve for ALP detection. Inset: the linearity of peak intensity with respect to lower ALP concentrations. Error bars were estimated from three replicate measurements.

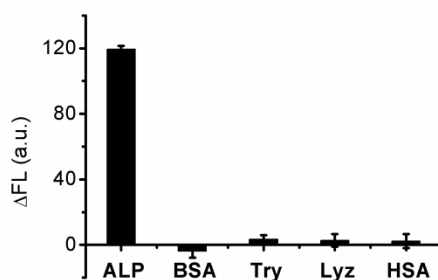

**Figure S5** The selectivity of the Cu/Ag NCs based method for ALP assay. The concentration was  $20 \text{ pM}$  for ALP and  $2 \text{ nM}$  for each other interfering proteins.

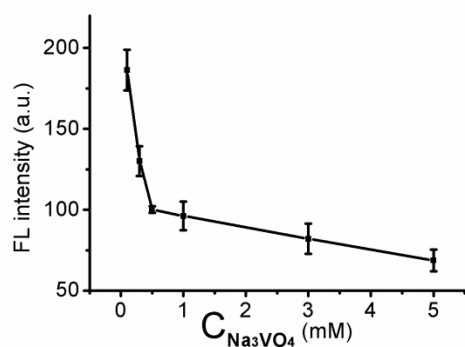

**Figure S6** The inhibition effect of  $Na_3VO_4$  on ALP activity.

**Table S1.** Comparison of different assays for ALP detection.

| Technique                                           | Analytical Method                   | Dynamic Range  | LOD     | Time of Incubation |
|-----------------------------------------------------|-------------------------------------|----------------|---------|--------------------|
| Fluorescence <sup>1</sup>                           | CdTe/CdS QDs                        | 3~1000 U/L     | 3 U/L   | 10 min             |
| Fluorescence Resonance Energy Transfer <sup>2</sup> | $\beta$ -cyclodextrin-modified QDs  | 0~800 U/L      | 10 U/L  | 10 min             |
| Fluorescence <sup>3</sup>                           | Enzymatic Formation of QDs          | 0~800 U/L      | 0.5 U/L | 50 min             |
| Colorimetry <sup>4</sup>                            | Gold Nanoparticle                   | 32~100000 U/L  | 3 U/L   | 65 min             |
| Fluorescence <sup>5</sup>                           | Carbon QDs                          | 16.7~782.6 U/L | 1.1 U/L | 30 min             |
| Colorimetry <sup>6</sup>                            | $Cu^{2+}$ -catalyzed ABTS– $H_2O_2$ | 30~400 U/L     | 27 U/L  | 30 min             |
| Fluorescence (This work)                            | Enzymatic Formation of Nanocluster  | 0.5~15 U/L     | 0.3 U/L | 60 min             |

**Table S2.** Determination of AFP added in normal human serum with this proposed immune strategy.

| Samples | Add<br>(ng mL <sup>-1</sup> ) | Found<br>(ng mL <sup>-1</sup> ) | Recovery<br>(%) |
|---------|-------------------------------|---------------------------------|-----------------|
| 1       | 12                            | 12.71                           | 105.9           |
| 2       | 30                            | 29.37                           | 97.9            |
| 3       | 45                            | 40.39                           | 89.8            |
| 4       | 50                            | 51.32                           | 102.6           |

## Reference

1. X. Ren, Z. Chen, X. Chen, J. Liu and F. Tang, *Journal of Luminescence*, 2014, 145, 330-334.
2. L. Jia, J.-P. Xu, D. Li, S.-P. Pang, Y. Fang, Z.-G. Song and J. Ji, *Chem. Commun.*, 2010, 46, 7166-7168.
3. N. Malashikhina, G. Garai-Ibabe and V. Pavlov, *Anal. Chem.*, 2013, 85, 6866-6870.
4. H. Jiao, J. Chen, W. Li, F. Wang, H. Zhou, Y. Li and C. Yu, *ACS Appl. Mater. Interfaces*, 2014, 6, 1979-1985.
5. Z. S. Qian, L. J. Chai, Y. Y. Huang, C. Tang, J. Jia Shen, J. R. Chen and H. Feng, *Biosens. Bioelectron.*, 2015, 68, 675-680.
6. L. Zhang, M. Li, Y. Qin, Z. Chu and S. Zhao, *Analyst*, 2014, 139, 6298-6303.
